# Supplementary material for: A TALE/HOX code unlocks WNT signalling response towards paraxial mesoderm
Source: PubMed Central journal article supplement (PMC8390530; doi:10.1038/s41467-021-25370-4), 2021-08-26
Supplement: 41467_2021_25370_MOESM1_ESM.pdf [file 41467_2021_25370_MOESM1_ESM.pdf]

## **Supplementary Information**

# **A TALE/HOX code unlocks WNT signalling response towards paraxial mesoderm**

Luca Mariani, Xiaogang Guo, Niels Alvaro Menezes,  
Anna Maria Drozd, Selgin Deniz Çakal, Qinhu Wang  
and Elisabetta Ferretti

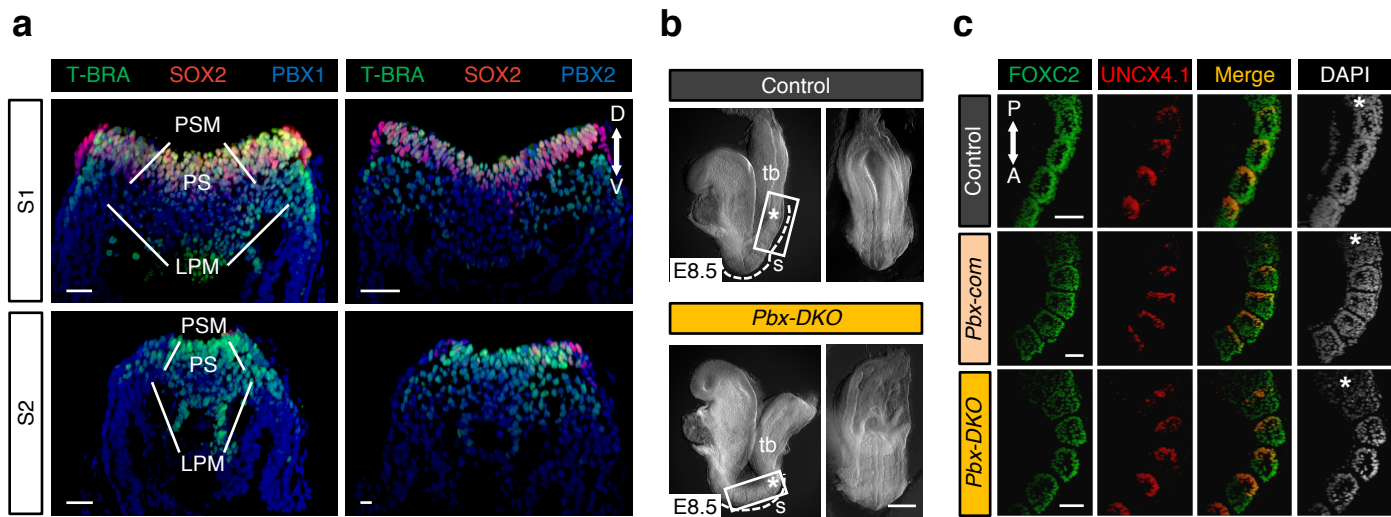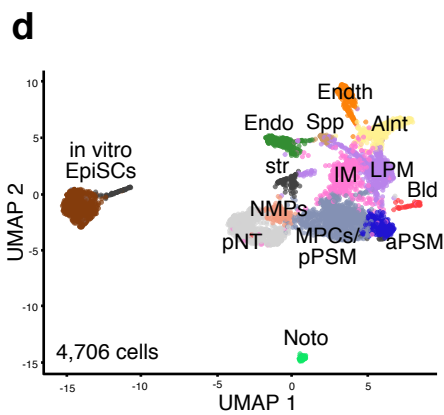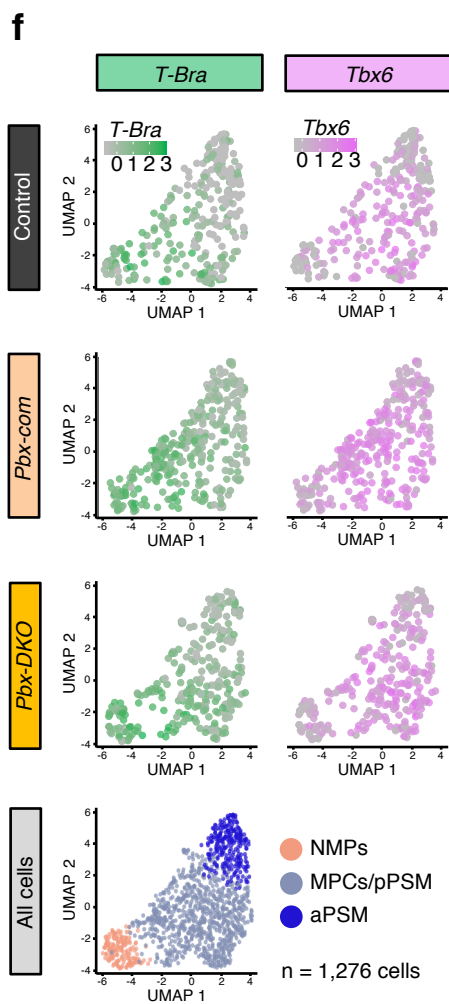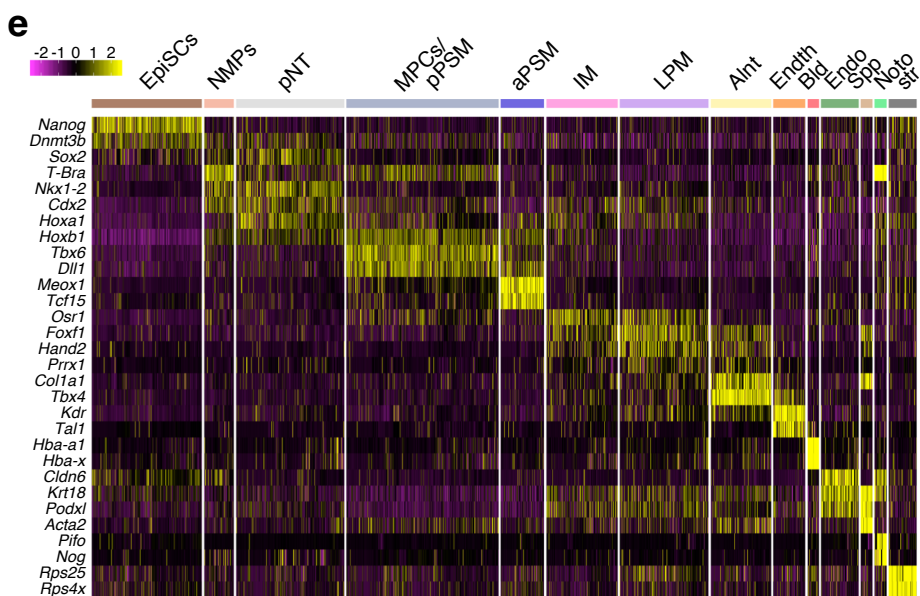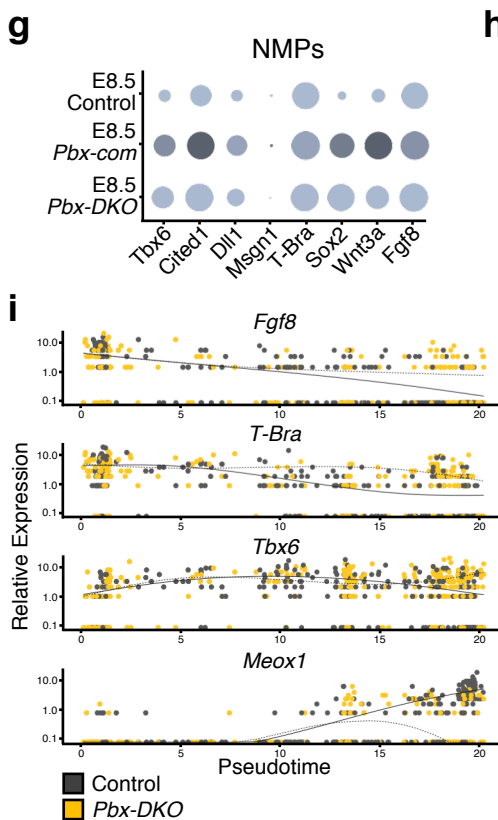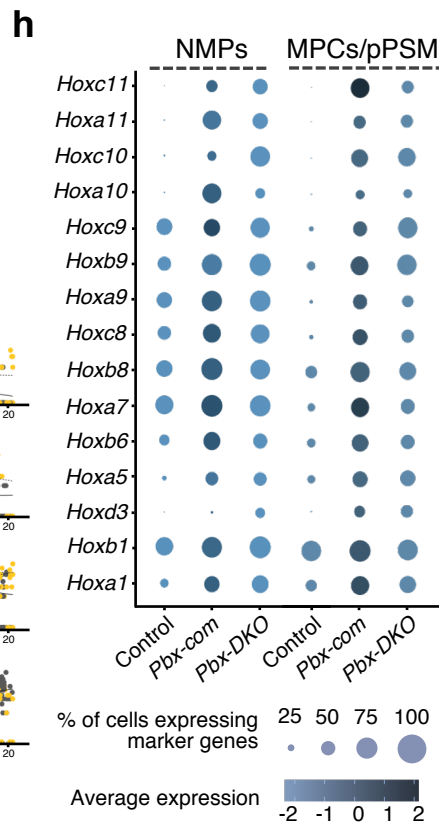



**Supplementary Fig. 1 | PBX play a critical role in the initial acquisition of PM fate.**

**a**, Immunofluorescence staining of E8.5 mouse tailbuds shows PBX1 and PBX2 localisation in the primitive streak (PS), pre-somitic mesoderm (PSM) and lateral plate mesoderm (LPM). Two transverse sections through the caudal lateral epiblast are shown. D dorsal, V ventral. Scale bars: 20  $\mu\text{m}$ . **b**, Gross morphology of E8.5 *Pbx-DKO* embryos showing enlarged tailbud (tb), shortened trunk and rudimentary somites (s). Lateral view on the left and posterior view on the right. The white frames highlight the regions shown in **c**. Scale bar: 200  $\mu\text{m}$ . **c**, Representative immunofluorescence staining for FOXC2 (green) and UNCX4.1 (red) on sagittal sections of E8.5 *Pbx-com* and *Pbx-DKO* embryos, displaying defective posterior somites development. P posterior, A anterior. Scale bars: 50  $\mu\text{m}$ . In **b** and **c**, asterisks denote the newly generated somites. **d**, ScRNA-seq of E8.5/E9.0 control, *Pbx-com* and *Pbx-DKO* embryonic tailbuds. Unsupervised clustering and UMAP visualisation of embryonic cells together with spiked-in EpiSCs support efficient removal of batch-effect. Individual cells are coloured according to annotated cluster identities: EpiSCs epiblast stem cells, NMPs neuromesodermal progenitors, pNT pre-neural tube, MPCs/pPSM mesodermal progenitor cells/posterior pre-somitic mesoderm, aPSM anterior pre-somitic mesoderm, IM intermediate mesoderm, LPM lateral plate mesoderm, Alnt allantois, Endth Endothelial cells, Bld blood, Endo endoderm, Spp splanchnopleura, Noto notochord, str stressed cells. **e**, Heatmap showing key genes distinguishing 14 clusters in E8.5/E9.0 tailbuds and in vitro EpiSCs. Colour bar indicates the intensity associated with normalised expression values. **f**, UMAP of control, *Pbx-com* and *Pbx-DKO* cells in NMPs (light pink), MPCs/pPSM (light blue) and aPSM (dark blue) clusters. Cells are coloured by expression of the NMP marker *T-Bra* (green) and the PSM marker *Tbx6* (magenta), showing enrichment of *T-Bra*<sup>pos</sup>; *Tbx6*<sup>pos</sup> MPCs in E8.5 *Pbx* mutants compared to controls. Colour bars indicate the intensity associated with normalised expression values. **g**, Expression analysis of selected lineage markers within the NMPs cluster isolated from E8.5 control and *Pbx* mutant tailbuds. Dot plot shows the relative expression of the NMP markers *T-Bra*, *Sox2*, *Wnt3a*, *Fgf8*, and the mesodermal genes *Tbx6*, *Cited1*, *Dll1*, *Msgn1*, indicating co-expression of NMP and MPC markers in *Pbx-com* and *Pbx-DKO* embryos. **h**, Expression analysis of *Hox* genes within the NMPs and MPCs/pPSM clusters isolated from E8.5 control and *Pbx* mutant tailbuds. Dot plot shows enhanced expression of 5' *Hox* genes in *Pbx-com* and *Pbx-DKO* embryos. Colour bar indicates the intensity associated with normalised expression values. **i**, Monocle's pseudotemporal ordering of NMPs along a path towards aPSM, showing the distribution of NMP markers *Fgf8* and *T-Bra*, and PSM genes *Tbx6* and *Meox1* in control (black) and *Pbx-DKO* cells (yellow). The graphs highlight the inability of *Pbx-DKO* cells to reach a mature aPSM stage, resulting in their accumulation as early progenitors.

**a**

E8.5 tailbud

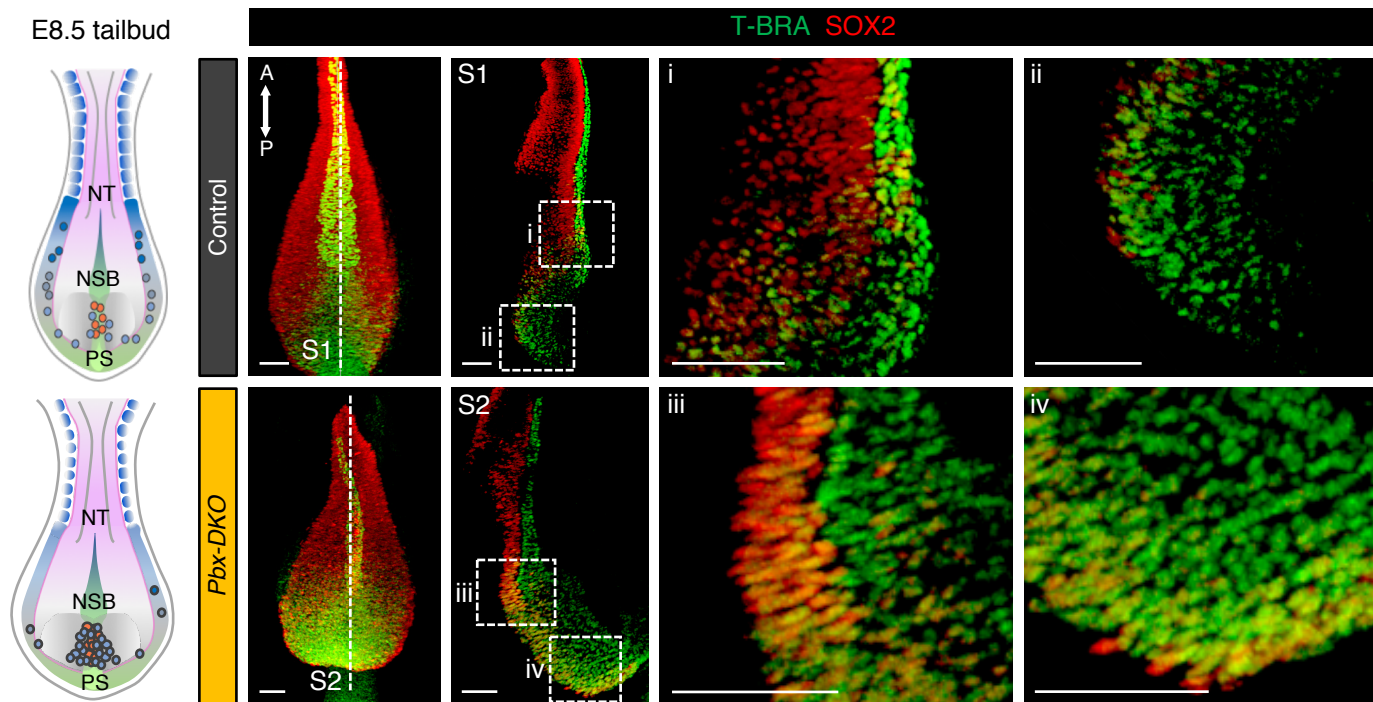**b**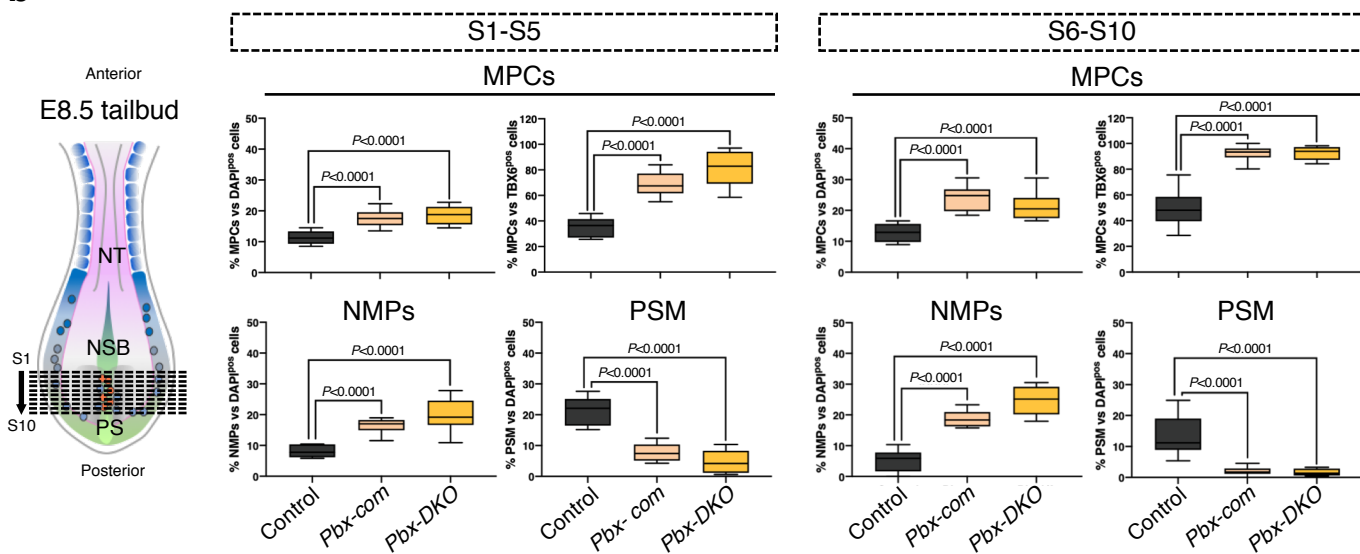**c**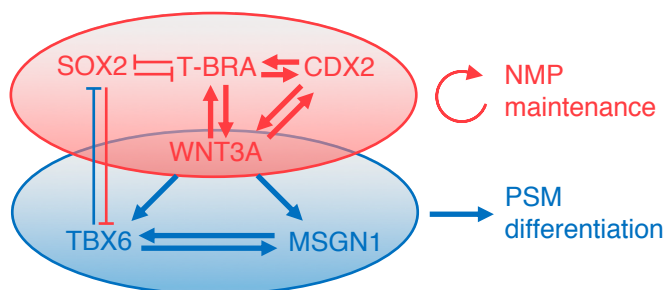**d**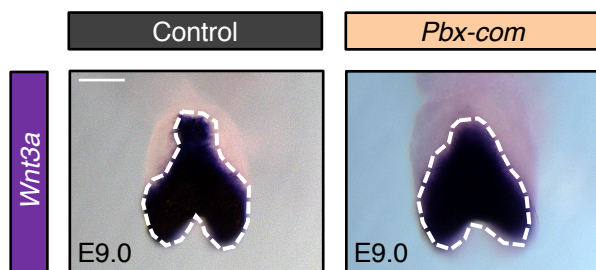

**Supplementary Fig. 2 | Impaired PSM formation in *Pbx* mutant embryos.** **a**, Confocal maximum intensity projection 3D reconstruction of E8.5 control and *Pbx-DKO* tailbuds stained with T-BRA (green) and SOX2 (red). Sagittal sections, S1 and S2, along the embryonic midline show accumulation of T-BRA<sup>pos</sup>;SOX2<sup>pos</sup> NMPs in CLE and posterior tailbud of *Pbx-DKO* (higher magnification shown in panels iii and iv) compared to controls (higher magnification shown in panels i and ii). The cartoons on the left depict E8.5 control and *Pbx-DKO* tailbuds, with NMPs represented as red dots and MPCs as blue dots. Scale bars: 50  $\mu$ m. **b**, Box plots assessing the proportion of T-BRA<sup>pos</sup>;TBX6<sup>pos</sup> cells (MPCs) relative to DAPI<sup>pos</sup> cells (total cells) or to TBX6<sup>pos</sup> cells (PSM), and T-BRA<sup>pos</sup>;SOX2<sup>pos</sup> cells (NMPs) and TBX6<sup>pos</sup> cells (PSM) relative to DAPI<sup>pos</sup> cells. Black dashed lines in the cartoon indicate the plane of sections. Sections S1-S5 represent the anterior CLE, while sections S6-S10 are relative to the posterior CLE and show the robust accumulation of NMPs and MPCs in the posterior tailbud. The box contains the 25<sup>th</sup> to 75<sup>th</sup> percentiles of the dataset, the centre line denotes the median value (50<sup>th</sup> percentile) and the whiskers extend from the smallest to the largest value. *P*-values were calculated by one-way ANOVA and Tukey's test for multiple comparisons and are indicated in the figure. In **a** and **b**: NSB node-streak border, PS primitive streak, NT neural tube, A anterior, P posterior. **c**, Schematics of the regulatory network operating in the mouse tailbud with WNT signalling sustaining both maintenance of the NMP state (red) and PSM differentiation (blue). **d**, *Wnt3a* mRNA *in situ* hybridization analysis of E9.0 tailbuds reveals expanded *Wnt3a* expression in the progenitor zone (delimited by white dashed lines) of *Pbx-com* embryos (light pink) compared to controls (black). Scale bar: 100  $\mu$ m.

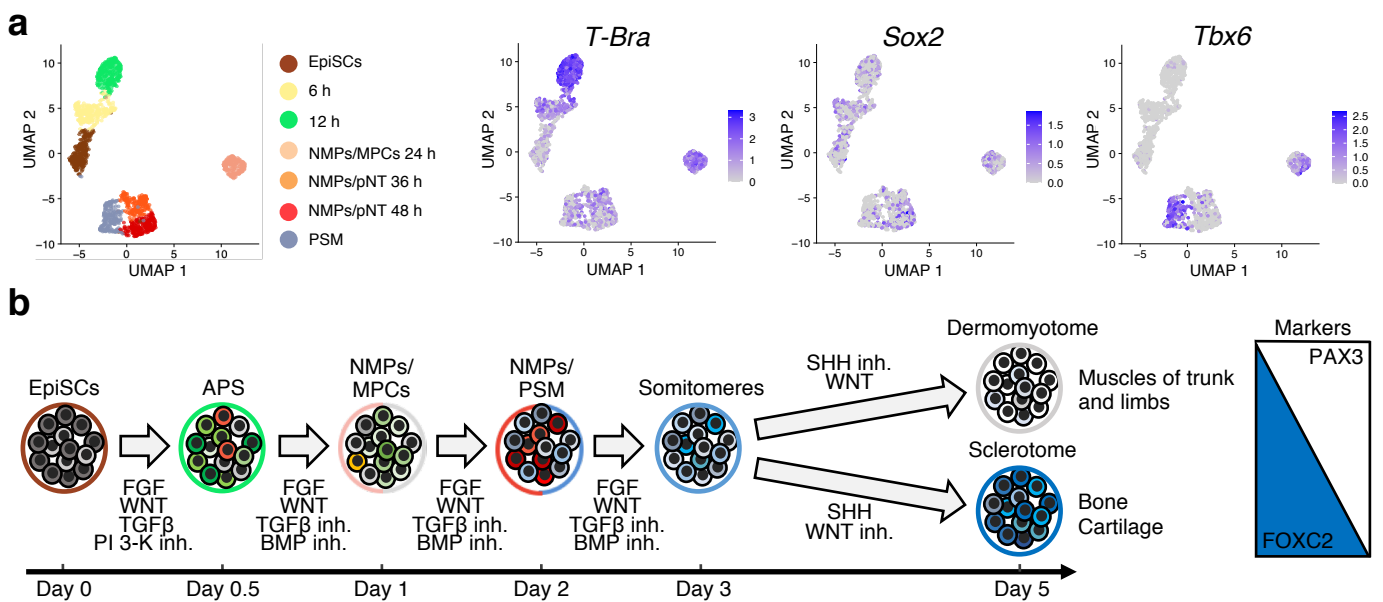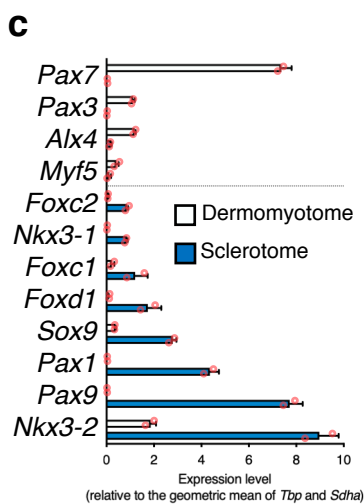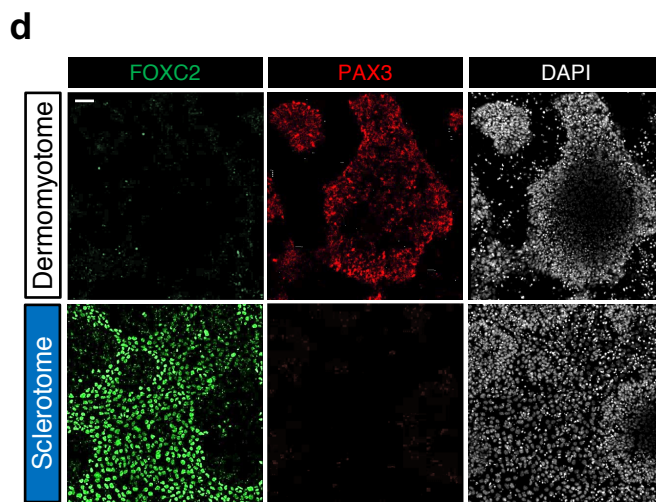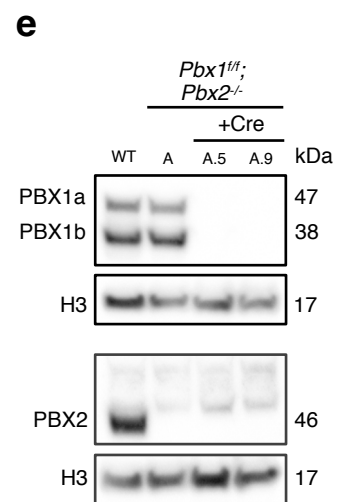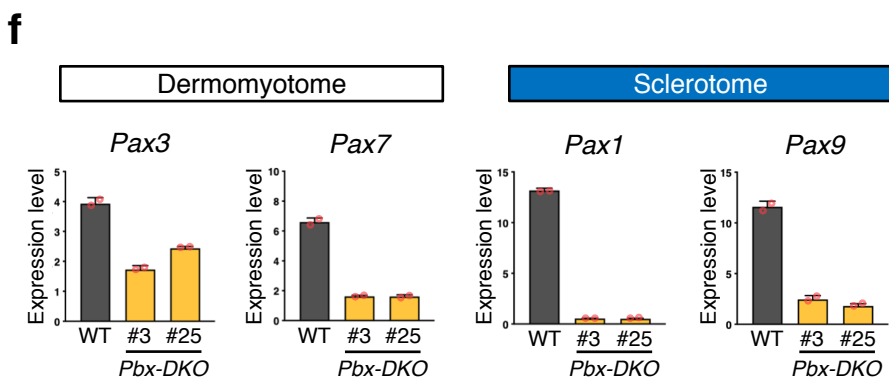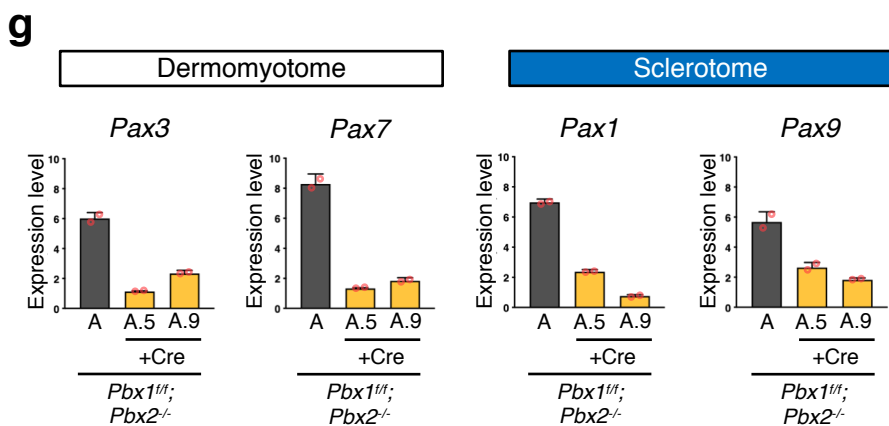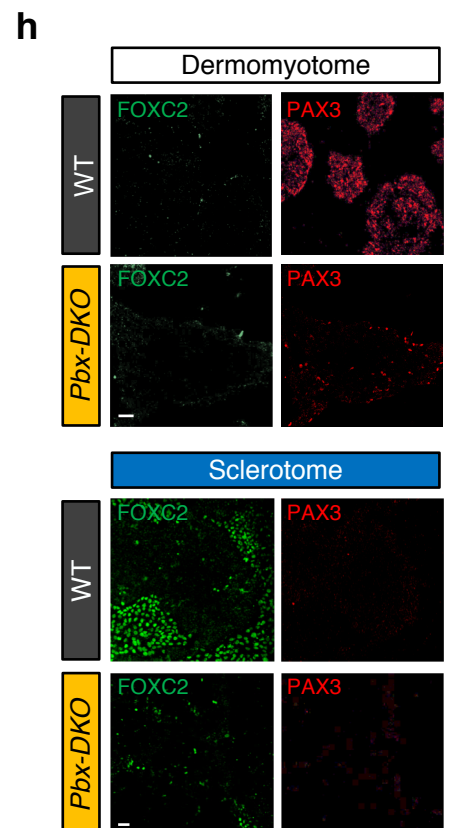

**Supplementary Fig. 3 | In vitro differentiation of WT and *Pbx-DKO* cells towards somite-derived tissues recapitulates the phenotype of *Pbx* mutant embryos.** **a**, UMAP visualization of in vitro PSM differentiation. Individual cells are coloured by expression of *T-Bra*, *Sox2* and *Tbx6*. All cells express *T-Bra* after 12 h of PS induction, indicating the high efficiency of the differentiation protocol. Colour bars indicate the intensity associated with normalised expression values. **b**, Schematics of EpiSC differentiation towards anterior primitive streak (APS), pre-somitic mesoderm (PSM) and somite-derived tissues, generated by providing either Sonic Hedgehog (SHH) or WNT to mirror the formation of sclerotome and dermomyotome, respectively. **c**, Relative mRNA expression of dermomyotome (white) and sclerotome (blue) genes measured by RT-qPCR at day 5 of differentiation in WT cells. **d**, Representative immunofluorescence staining for the sclerotome marker FOXC2 (green) and the dermomyotome marker PAX3 (red) at day 5 of differentiation, showing the differentiation potential of the NMPs generated in vitro. Scale bar: 50  $\mu$ m. **e**, Western blot analysis confirming the absence of PBX1 and PBX2 proteins in the *Pbx-DKO* lines generated by CRE-mediated recombination of *Pbx1<sup>fllox/fllox</sup>;Pbx2<sup>-/-</sup>* Bl6-derived EpiSCs. **f-g**, Relative mRNA expression of dermomyotome (white) and sclerotome (blue) genes measured by RT-qPCR at day 5 of differentiation in WT (black) and *Pbx-DKO* lines (yellow) generated by CRISPR/Cas9 (**f**) or CRE-mediated recombination (**g**). **h**, Representative immunofluorescence staining for the signature markers FOXC2 (green, sclerotome) and PAX3 (red, dermomyotome) at day 5 of differentiation, showing impaired ability of the *Pbx-DKO* lines to differentiate into dermomyotome and sclerotome, mimicking the defects of the *Pbx* mutant embryos. Scale bars: 50  $\mu$ m. Data are mean  $\pm$  s.e.m. (n=2 biological replicates) in **c**, **f** and **g**.

**a**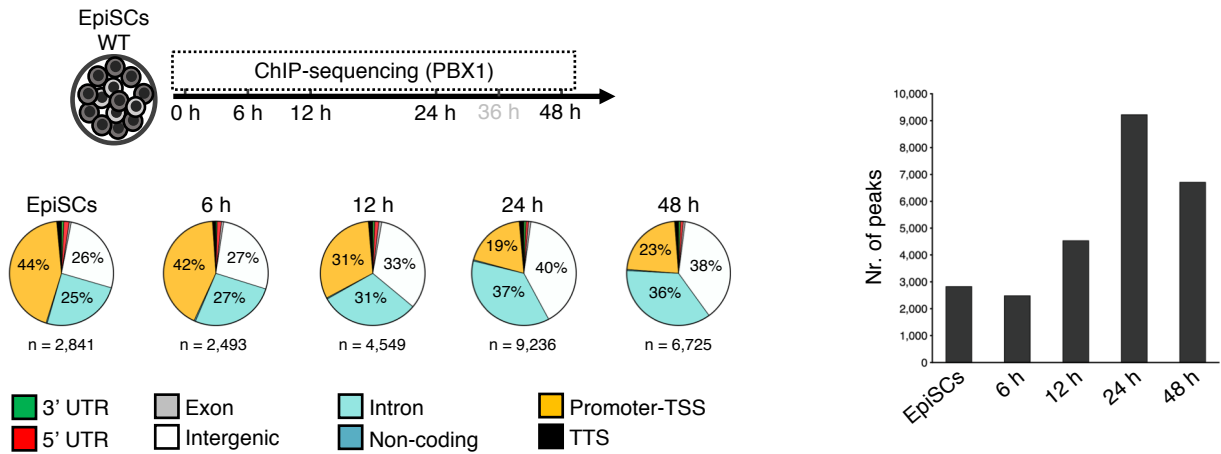**b**Genes **downregulated** in *Pbx-DKO* at 12 h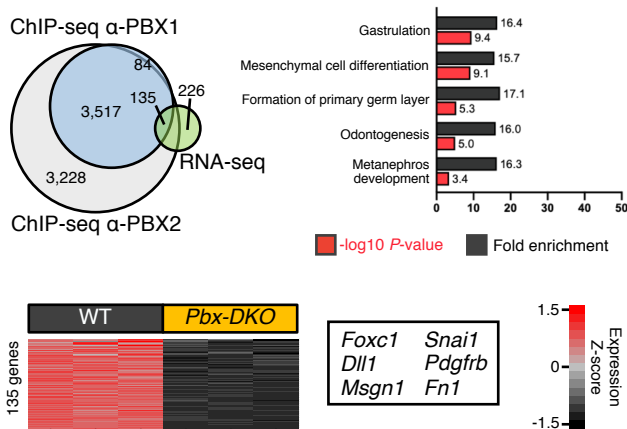**c**Genes **upregulated** in *Pbx-DKO* at 12 h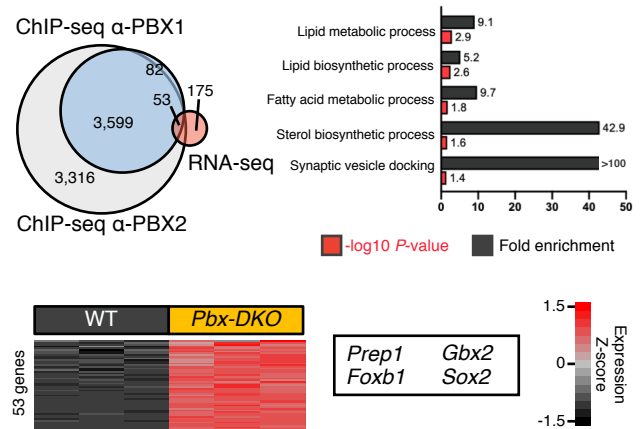

**Supplementary Fig. 4 | PBX proteins are dynamically recruited to PM regulatory regions during differentiation.** **a**, Left: annotation of the PBX1 ChIP-seq peaks according to their genomic position. The regions bound by PBX1 are subdivided based on binding occurrence at transcription start sites (TSSs) (-1 kb to +100 bp), 5' UTRs (-10 kb to -1 kb), transcription termination sites (TTSs) (-100 bp to +1 kb), 3' UTRs (+1 kb to +10 kb), introns, exons and intergenic regions; n = ChIP-seq peaks. Right: histogram showing the number of PBX1 ChIP-seq peaks across differentiation. **b**, Top: overlap of downregulated genes in *Pbx-DKO* cells (RNA-seq) and genes associated with PBX1 and PBX2-occupied regions at 12 h (ChIP-seq). GO-term enrichment analysis shows correlation with terms associated with general mesoderm and PSM differentiation (Binomial test with Bonferroni correction). Bottom: heatmap displaying RNA-seq expression Z-scores computed for 135 downregulated genes in *Pbx-DKO* (yellow) compared to WT cells (black). Representative markers are indicated. **c**, Top: overlap of upregulated genes in *Pbx-DKO* cells (RNA-seq) and genes associated with PBX1 and PBX2-occupied regions at 12 h (ChIP-seq). GO-term enrichment analysis shows overrepresentation of terms associated with metabolic processes (Binomial test with Bonferroni correction). Bottom: heatmap showing RNA-seq expression Z-scores computed for 53 upregulated genes in *Pbx-DKO* (yellow) compared to WT cells (black). Representative markers are indicated. In **b** and **c**, significance was assessed by DEseq2 on the basis of two-sided Wald test with Benjamini-Hochberg adjusted *P*-values ( $P \leq 0.05$ , fold-change  $\geq 1.5$ ). n=3 biological replicates.



**a**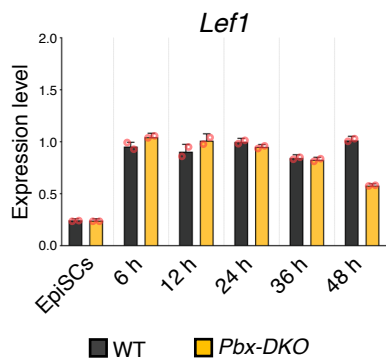**b**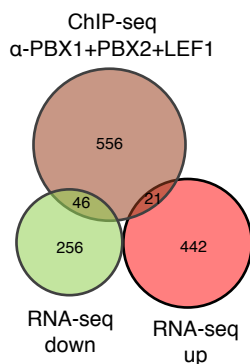

Genes co-regulated  
by PBX1, PBX2 and LEF1 at 24 h

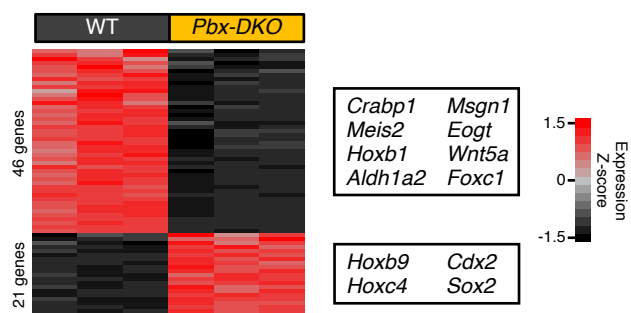**c**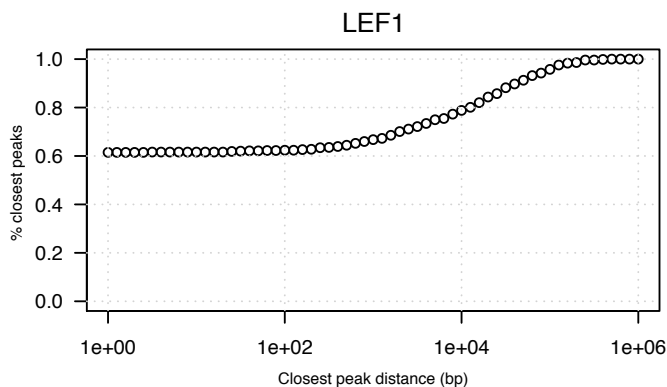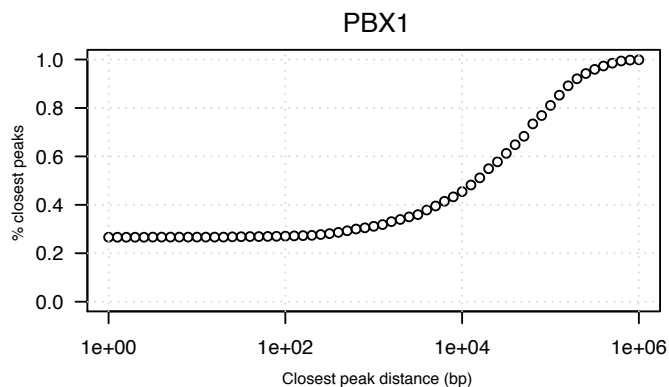**d**

Genes downregulated in *Pbx-DKO* at 24 h

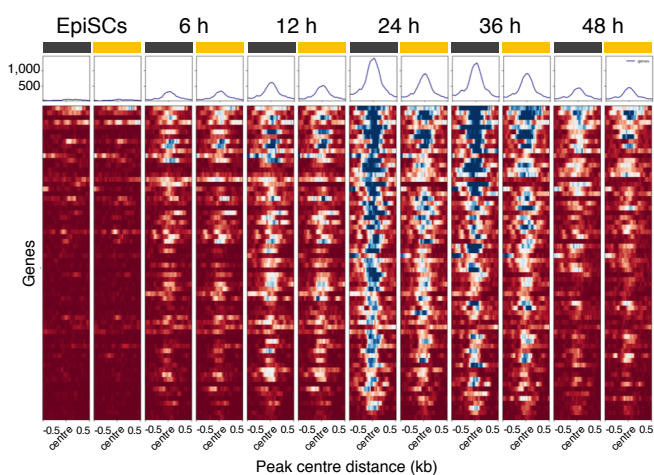**e**

Genes upregulated in *Pbx-DKO* at 24 h

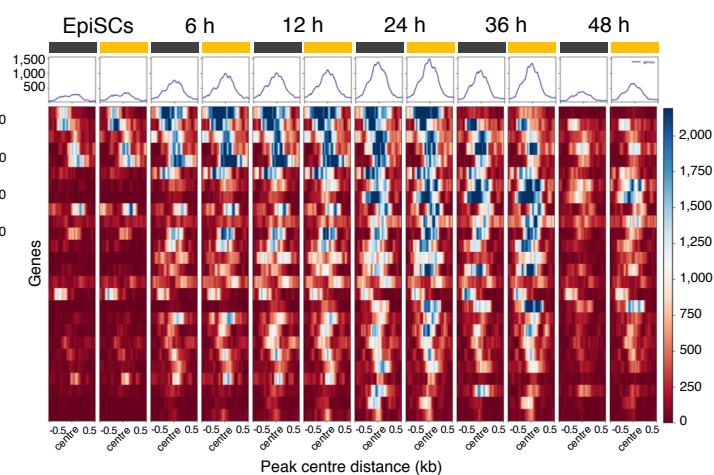

**Supplementary Fig. 5 | Recruitment of PBX-LEF1 on PM genes.** **a**, Relative mRNA expression of *Lef1* measured by RT-qPCR, exhibiting comparable expression in WT (black) and *Pbx-DKO* cells (yellow) along PSM differentiation. Data are mean  $\pm$  s.e.m.  $n=2$  biological replicates. **b**, Left: overlap of genes co-occupied by PBX1, PBX2 and LEF1 (brown) with the downregulated (green) and upregulated (red) genes in *Pbx-DKO* cells compared to WT, showing a total of 67 genes under the direct control of combined PBX-LEF1 activity. Right: heatmap displaying RNA-seq expression Z-scores computed for PBX-LEF1 co-regulated genes that are differentially expressed in WT and *Pbx-DKO* cells at 24 h ( $P \leq 0.05$ , fold-change  $\geq 1.5$ ). Representative subsets of target genes directly regulated by PBX and LEF1 are reported in the boxes and include important PSM regulators.  $n=3$  biological replicates. Significance was assessed by DEseq2 on the basis of two-sided Wald test with Benjamini–Hochberg adjusted  $P$ -values. **c**, Histograms showing the distribution of distances between LEF1 and PBX1 ChIP-seq peaks. Left: for each LEF1 peak identified at 24 h of differentiation, bedtools was used to determine the closest PBX1 peaks; right: for each PBX1 peak identified at 24 h of differentiation, bedtools was used to determine the closest LEF1 peaks. **d**, Heatmap of chromatin accessibility of WT (black) and *Pbx-DKO* cells (yellow) at LEF1-occupied regions that are associated with downregulated PBX-LEF1 target genes in *Pbx-DKO* along PSM differentiation, showing reduced accessibility in *Pbx-DKO* cells at 24 and 36 h. **e**, Heatmap of chromatin accessibility at LEF1-bound regions associated with upregulated PBX-LEF1 target genes in *Pbx-DKO* (yellow) compared to WT (black) cells. Chromatin accessibility is comparable between WT and *Pbx-DKO* cells. The scale represents normalised counts (RPKM) for ATAC-seq peak signals  $\pm 500$  bp around the centre of the peak in **d** and **e**.

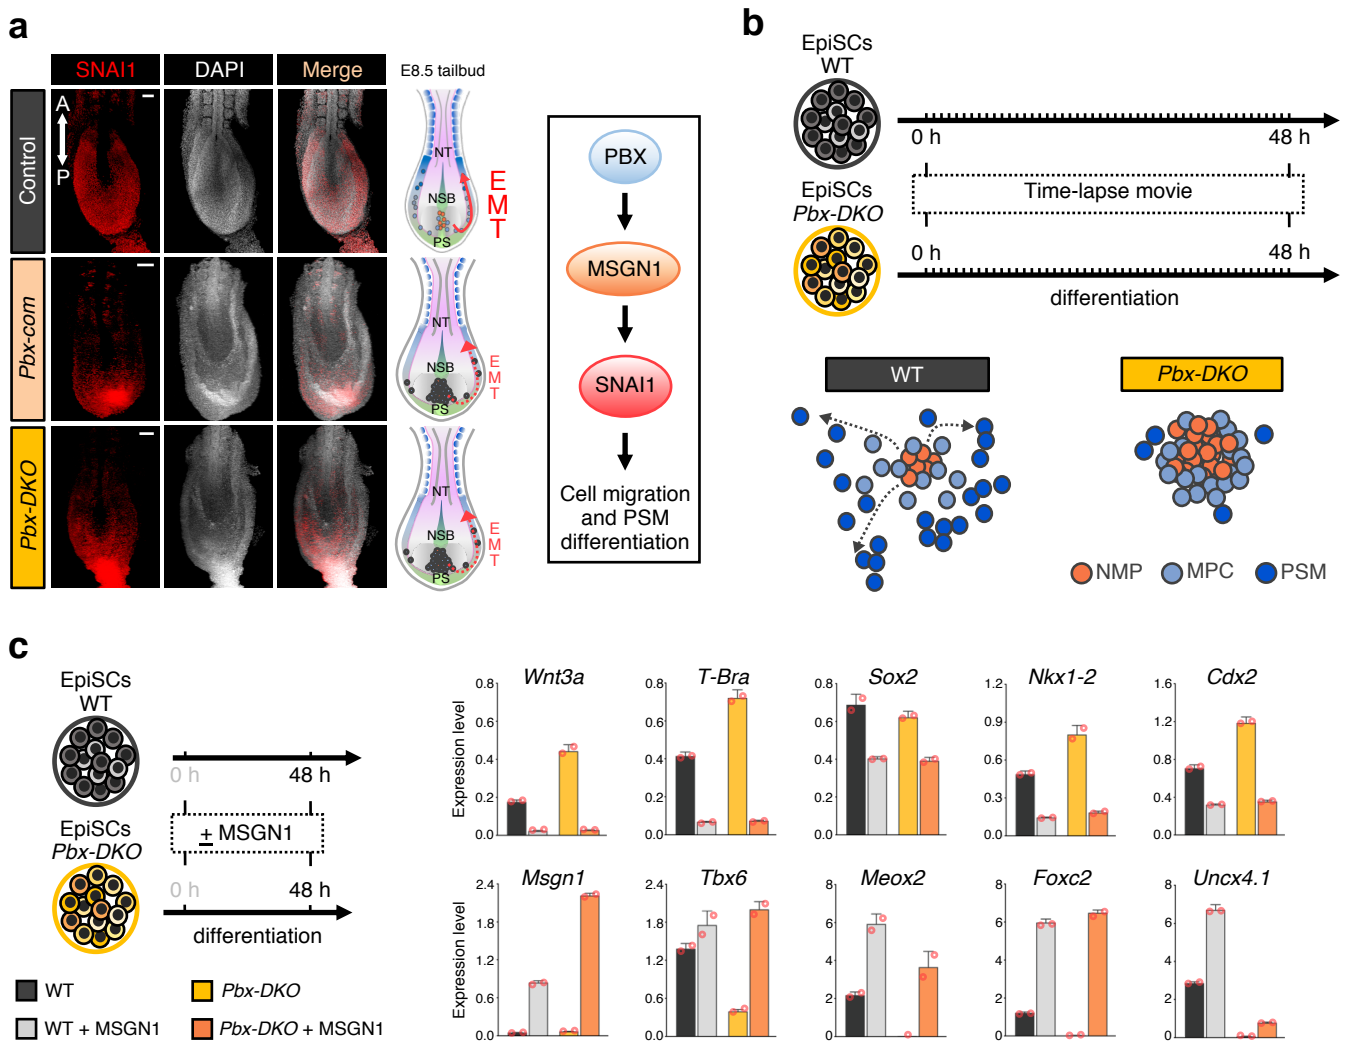

**Supplementary Fig. 6 | PBX control *Msgn1* expression and in turn EMT and migration of MPCs.** **a**, Confocal maximum intensity projection images of E8.5 control, *Pbx-com* and *Pbx-DKO* embryos probed with SNAI1 antibody (red) and counterstained with DAPI (grey), showing downregulation of the MSGN1 target and EMT marker SNAI1 in the tailbud of *Pbx* mutants. The cartoons on the right depict E8.5 control and *Pbx* mutant tailbuds, with NMPs represented as red dots and MPCs as blue dots. NSB node-streak border, PS primitive streak, NT neural tube, A anterior, P posterior, EMT epithelial-to-mesenchymal transition. Scale bars: 50  $\mu$ m. The gene regulatory network involving PBX, MSGN1 and SNAI1 is reported in the box. **b**, Top: schematics of EpiSC differentiation to PSM. Pictures were acquired every hour to make time-lapse videos of in vitro differentiation (see Supplementary Movies 1, 2). Bottom: cartoon illustrating the migratory behaviour of WT and *Pbx-DKO* cells upon differentiation. WT cells progressively leave the NMP zone, while mutant cells fail to migrate and accumulate in the progenitor area. **c**, Rescue of the *Pbx* mutant paraxial mesoderm phenotype by lentivirus-mediated expression of *Msgn1* in *Pbx-DKO* cells (orange), resulting in downregulation of NMP markers (*Wnt3a*, *T-Bra*, *Sox2*, *Nkx1-2* and *Cdx2*) and upregulation of PSM genes (*Msgn1*, *Tbx6*, *Meox2*, *Foxc2* and *Uncx4.1*). Data are mean  $\pm$  s.e.m. n=2 biological replicates.



**Supplementary Fig. 7 | Assembly of a specific PBX/MEIS2/HOX-1 ternary complex on *Msgn1* promoter.** **a**, Representative immunofluorescence staining for T-BRA (white), MEIS2 (red) and LEF1 (green) (left), and T-BRA (white), SOX2 (red) and HOXB1 (green) (right), at 48 h of differentiation in WT cells. MEIS2, HOXB1 and LEF1 are enriched in cells adopting a PSM identity, in agreement with their suggested role in driving PSM differentiation from NMPs (T-BRA<sup>pos</sup>;SOX2<sup>pos</sup>, dashed white lines). Scale bar: 50  $\mu$ m. **b**, Schematic representation of all oligonucleotides employed in the EMSA experiments and formation of the PBX/MEIS2/HOXA1 complex. The PBX/HOX-1-binding site is highlighted in red. **c**, EMSA with in vitro-translated PBX1A, PBX1B, PBX2, PBX3, MEIS2, HOXA1 and HOXB1 proteins, showing that a ternary complex (TC) is formed with any combination of TALE and HOX-1 proteins and the *Msgn1-P2* oligonucleotide. The composition of each binding reaction is indicated at the top. LYS indicates the endogenous activity present in the reticulocyte lysate. **d**, In the absence of HOX-1, only PBX/PREP1 heterodimeric complexes (D) can bind to *Msgn1-P2* oligonucleotide by EMSA. **e**, EMSA with increased levels of in vitro-translated HOXA1, showing that the ternary complexes PBX/MEIS2/HOXA1 (TC) have higher affinity for *Msgn1-P2* compared to the PBX/PREP1 complexes, which bind also as heterodimers (D). **f-g**, Binding affinity properties of the ternary complex tested by EMSA. **f**, Analysis of dissociation rate of the complexes formed on *Msgn1-P1*. The oligo was incubated on ice for 10 minutes with the in vitro-translated proteins, as indicated at the top. A 50X-fold excess of unlabelled *Msgn1-P1* was added and aliquots analysed by EMSA every 5 min as indicated. The ternary complex PBX1A/MEIS2/HOXB1 (TC) is more stable and dissociates slowly compared to the dimeric complex PBX3/PREP1 (D). **g**, EMSA competition assays. Dimeric complex PBX1A/PREP1 (D), ternary complex PBX1A/MEIS2/HOXB1 (TC) and labelled *Msgn1-P1* were incubated with increased amount of cold *Msgn1-P1* competitor, showing higher affinity of the TC for *Msgn1-P1* oligonucleotide.

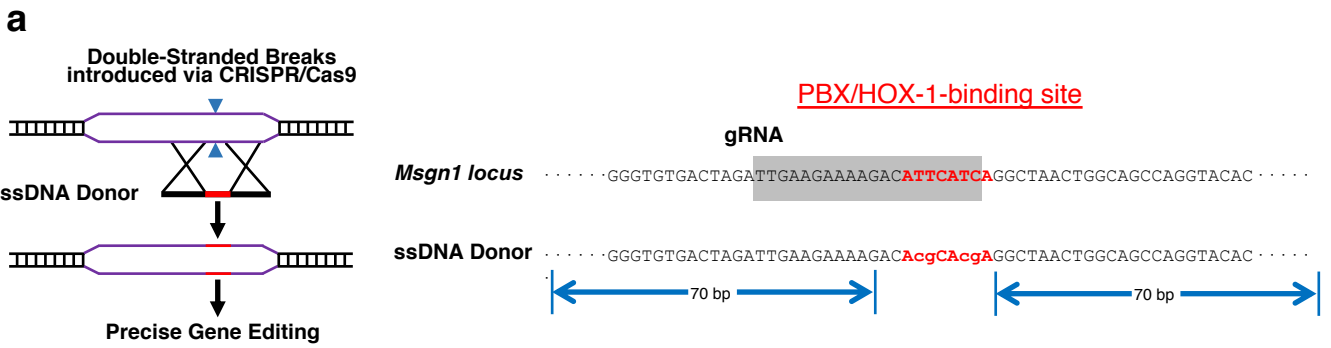

**b**

PBX/HOX-1-binding site

|                        |    |                                                           |          |
|------------------------|----|-----------------------------------------------------------|----------|
| WT                     | a1 | GGGTGTGACTAGATTGAAGAAAAGACATTCATCAGGCTAACTGGCAGCCAGGTACAC |          |
|                        | a2 | GGGTGTGACTAGATTGAAGAAAAGACATTCATCAGGCTAACTGGCAGCCAGGTACAC |          |
| <i>pMsgn1-mut</i> # 28 | a1 | GGGTGTGACTAGATTGAAGAAAAGACAcgCAcgAGGCTAACTGGCAGCCAGGTACAC | (Δ4, +4) |
|                        | a2 | GGGTGTGACTAGATTGAAGAAAAGACAT---TCAGGCTAACTGGCAGCCAGGTACAC | (Δ3)     |
| <i>pMsgn1-mut</i> # 53 | a1 | GGGTGTGACTAGATTGAAGAAAAGACAcgCAcgAGGCTAACTGGCAGCCAGGTACAC | (Δ4, +4) |
|                        | a2 | GGGTGTGACTAGATTGAAGAAAAGAC-T--ATCAGGCTAACTGGCAGCCAGGTACAC | (Δ3)     |
| <i>pMsgn1-mut</i> # 73 | a1 | GGGTGTGACTAGATTGAAGAAAAGACAcgCAcgAGGCTAACTGGCAGCCAGGTACAC | (Δ4, +4) |
|                        | a2 | GGGTGTGACTAGATTGAAGAAAAGACAg-----GCTAACTGGCAGCCAGGTACAC   | (Δ8, +1) |

**Supplementary Fig. 8 | Strategy to generate EpiSC lines carrying point mutations abrogating recruitment of the PBX complexes to the *Msgn1* regulatory region. a, Left:** CRISPR/Cas9-based strategy used to mutagenise the PBX/HOX-1-binding site on *Msgn1* promoter. Right, top: guide RNA (gRNA) sequence (in grey) and PBX/HOX-1-binding site (in red). Right, bottom: single-stranded DNA (ssDNA) with 70 bp *Msgn1* homology arms flanking the mutagenised PBX/HOX-1-binding site, used for precise CRISPR/Cas9 editing and homology-directed repair (HDR). Lowercase letters in red indicate the introduced mutations. **b, DNA sequencing readouts of the three independently generated *pMsgn1-mut* lines used in this study, revealing precise editing of one allele (a1) and introduction of small indels in the other allele (a2). The wild-type sequence is shown at the top with the PBX/HOX-1-binding site labelled in red. Red dashes indicate deletions and lowercase letters insertions. Number of deleted (Δ) or inserted (+) base pairs is reported in brackets. Of note, recruitment of the PBX/HOX-1 complex to the PBX/HOX-1-binding site is abolished in all three lines, as representatively shown in Fig. 7d.**



**Supplementary Table 1. Summary of cytokines and signalling pathway inhibitors used in this study.**

| <b>Item name</b> | <b>Description</b>     | <b>Company</b>      | <b>Catalog nr.</b> |
|------------------|------------------------|---------------------|--------------------|
| A-83-01          | TGF- $\beta$ inhibitor | Tocris              | 2939               |
| Activin A        | TGF- $\beta$ agonist   | Peprotech           | 120-14E            |
| C59              | WNT inhibitor          | Cellagen Technology | C7641              |
| CHIR-99021       | WNT agonist            | Axon MedChem        | 1386               |
| bFGF             | FGF agonist            | Peprotech           | 450-33             |
| GDC-0449         | Hedgehog inhibitor     | Axon MedChem        | 1500               |
| LDN193189        | BMP inhibitor          | Sigma               | SML0559            |
| PIK-90           | PI 3-K inhibitor       | EMD Millipore       | 528117             |
| SAG 21k          | Hedgehog agonist       | Tocris              | 5282               |
| XAV939           | WNT inhibitor          | Sigma               | X3004              |

**Supplementary Table 2. Antibodies used for immunofluorescence staining of adherent cells.**

| <b>Primary Antibody (clonality, host)</b> | <b>Company</b>            | <b>Catalog nr.</b> | <b>Dilution</b> |
|-------------------------------------------|---------------------------|--------------------|-----------------|
| FOXC2 (polyclonal, Sheep)                 | R&D Systems               | AF6989             | 1:100           |
| HOXB1 (polyclonal, Sheep)                 | R&D Systems               | AF6318             | 1:100           |
| LEF1 (monoclonal, Rabbit)                 | Cell Signaling Technology | 2230               | 1:100           |
| MEIS2 (monoclonal, Mouse)                 | Santa Cruz Biotechnology  | sc81986            | 1:100           |
| PAX3 (monoclonal, Mouse)                  | DSHB                      | AB_528426          | 1:100           |
| SOX2 (monoclonal, Mouse)                  | Santa Cruz Biotechnology  | sc-365823          | 1:100           |
| T-BRA (polyclonal, Goat)                  | R&D Systems               | AF2085             | 1:100           |
| T-BRA (monoclonal, Rabbit)                | R&D Systems               | MAB20851           | 1:100           |
| TBX6 (polyclonal, Goat)                   | R&D Systems               | AF4744             | 1:50            |
| <b>Secondary Antibody (host)</b>          | <b>Company</b>            | <b>Catalog nr.</b> | <b>Dilution</b> |
| Goat Alexa Fluor 568 (Donkey)             | Thermo Fisher Scientific  | A-11057            | 1:200           |
| Mouse Alexa Fluor 647 (Donkey)            | Thermo Fisher Scientific  | A-31571            | 1:200           |
| Rabbit Alexa Fluor 488 (Donkey)           | Thermo Fisher Scientific  | A-21206            | 1:200           |
| Sheep Alexa Fluor 488 (Donkey)            | Thermo Fisher Scientific  | A-11015            | 1:200           |

**Supplementary Table 3. Antibodies used for immunofluorescence staining of embryos.**

| <b>Primary Antibody (clonality, host)</b> | <b>Company</b>            | <b>Catalog nr.</b> | <b>Dilution</b> |
|-------------------------------------------|---------------------------|--------------------|-----------------|
| FOXC2 (polyclonal, Sheep)                 | R&D Systems               | AF6989             | 1:100           |
| LEF1 (monoclonal, Rabbit)                 | Cell Signaling Technology | 2230               | 1:100           |
| PBX1 (polyclonal, Rabbit)                 | Cell Signaling Technology | 4342               | 1:100           |
| PBX2 (polyclonal, Rabbit)                 | Thermo Fisher Scientific  | PA5-63964          | 1:100           |
| SNAI1 (monoclonal, Rabbit)                | Cell Signaling Technology | 3879               | 1:100           |
| SOX2 (monoclonal, Mouse)                  | Santa Cruz Biotechnology  | sc-365823          | 1:100           |
| T-BRA (polyclonal, Goat)                  | R&D Systems               | AF2085             | 1:100           |
| T-BRA (monoclonal, Rabbit)                | R&D Systems               | MAB20851           | 1:100           |
| TBX6 (polyclonal, Goat)                   | R&D Systems               | AF4744             | 1:50            |
| UNCX (polyclonal, Rabbit)                 | Thermo Fisher Scientific  | PA5-66568          | 1:100           |
| <b>Secondary Antibody (host)</b>          | <b>Company</b>            | <b>Catalog nr.</b> | <b>Dilution</b> |
| Goat Alexa Fluor 568 (Donkey)             | Thermo Fisher Scientific  | A-11057            | 1:500           |
| Mouse Alexa Fluor 647 (Donkey)            | Thermo Fisher Scientific  | A-31571            | 1:500           |
| Rabbit Alexa Fluor 488 (Donkey)           | Thermo Fisher Scientific  | A-21206            | 1:500           |
| Sheep Alexa Fluor 488 (Donkey)            | Thermo Fisher Scientific  | A-11015            | 1:500           |

**Supplementary Table 4. Antibodies used for ChIP.**

| <b>Primary Antibody (clonality, host)</b> | <b>Company</b>            | <b>Catalog nr.</b> | <b>Dilution</b> |
|-------------------------------------------|---------------------------|--------------------|-----------------|
| IgG (polyclonal, Goat)                    | R&D Systems               | AB-108-C           | 1:1,000         |
| IgG (polyclonal, Rabbit)                  | Cell Signaling Technology | 2729               | 1:1,000         |
| LEF1 (monoclonal, Rabbit)                 | Cell Signaling Technology | 2230               | 1:100           |
| MEIS2 (polyclonal, Rabbit)                | Abcam                     | ab73164            | 1:125           |
| PBX1 (polyclonal, Rabbit)                 | Cell Signaling Technology | 4342               | 1:100           |
| PBX2 (polyclonal, Rabbit)                 | Thermo Fisher Scientific  | PA5-63964          | 1:125           |
| PREP1 (polyclonal, Rabbit)                | Thermo Fisher Scientific  | PA5-30244          | 1:125           |
| T-BRA (polyclonal, Goat)                  | R&D Systems               | AF2085             | 1:125           |

**Supplementary Table 5. Primers and UPL probes used for RT-qPCR.**

| <b>Gene</b>    | <b>Forward</b>           | <b>Reverse</b>            | <b>Probe</b> |
|----------------|--------------------------|---------------------------|--------------|
| <i>Alx4</i>    | GACACACTACCCTGATGTGTATGC | TCCCTCTTTTCGCCACTTG       | 32           |
| <i>Cdx2</i>    | CACCATCAGGAGGAAAAGTGA    | CTGCGGTTCTGAAACCAAAT      | 34           |
| <i>Foxc1</i>   | GCTTTCCTGCTCATTCTGCTT    | AAATATCTTACAGGTGAGAGGCAAG | 34           |
| <i>Foxc2</i>   | CGGCTAGGACTGGACAACCTC    | CTGACAGCTCGCATTGCTC       | 95           |
| <i>Foxd1</i>   | GACTCTGCACCAAGGGACA      | TTCCTAACAAATTGGAAATCCTAGC | 47           |
| <i>Lef1</i>    | TCCTGAAATCCCCACCTTC      | ACCCGTGATGGGATAAACAG      | 94           |
| <i>Meox2</i>   | CTAGACCTCACTGAAAGACAGGTG | TTGCTGTCCCCCTTTGAC        | 2            |
| <i>Msgn1</i>   | AATTACCTGCCGCCTGTCT      | TGAGTGTCTGGATCTTGGTGA     | 106          |
| <i>Myf5</i>    | CTGCTCTGAGCCCACCAG       | GACAGGGCTGTTACATTCAGG     | 10           |
| <i>Nkx1-2</i>  | CCAATCGGGTCACAGGAG       | CGCATCCTCAGCTTCCTC        | 13           |
| <i>Nkx3-1</i>  | CGACTGAACCCGAGTCTGAT     | AATCACCTGAGTGTGAGAGAAGG   | 5            |
| <i>Nkx3-2</i>  | GAGTAGGCTCCGGAAAAGC      | TGTAGGGCTTCGCTCCTG        | 103          |
| <i>Pax1</i>    | CGGACGTTTATGGAGCAAAC     | TCTCCATCTTGGGGGAGTA       | 81           |
| <i>Pax3</i>    | GCGAGAAAAAGGCTAAACACA    | CGGAGCCTTCATCTGACTG       | 110          |
| <i>Pax7</i>    | TACCAGCTGCCGACTCTAC      | CTGGGGCCTGTGTACTGTG       | 77           |
| <i>Pax9</i>    | AGCAGGAAGCCAAGTACGG      | TGGATGCTGAGACGAAACTG      | 33           |
| <i>Sdha</i>    | TGTTTCAGTTCCACCCACACA    | TCTCCACGACACCCTTCTG       | 71           |
| <i>Sox2</i>    | GGCAGAGAAGAGAGTGTGTTGC   | TCTTCTTTCTCCCAGCCCTA      | 34           |
| <i>Sox9</i>    | GTACCCGCATCTGCACAAC      | CTCCTCCACGAAGGGTCTCT      | 66           |
| <i>Tbp</i>     | GGGGAGCTGTGATGTGAAGT     | CCAGGAAATAATTCTGGCTCA     | 97           |
| <i>T-Bra</i>   | CAGCCACCTACTGGCTCTA      | GAGCCTGGGGTGATGGTA        | 100          |
| <i>Tbx6</i>    | TGACTGATACTCGGCAAGCA     | CGCTGTGGGGACAGAGAT        | 9            |
| <i>Uncx4.1</i> | GCACCCGCACCAACTTTA       | GCGATTTTGAACCAGACC        | 25           |
| <i>Wnt3a</i>   | CTTAGTGCTCTGCAGCCTGA     | GAGTGCTCAGAGAGGAGTACTGG   | 76           |
